# Supplementary material for: Phlebotomus papatasi Antimicrobial Peptides in Larvae and Females and a Gut-Specific Defensin Upregulated by Leishmania major Infection
Source: MDPI journal article supplement (doi:10.3390/microorganisms9112307), 2021-11-06
Supplement: s1 [file s1]

**Table S1:** L3 and L4 larvae growth period under different feeding regimen

| larvae food  | elapsed days between<br>L3 and early-L4 stages |                    | elapsed days between<br>early L4 and late-L4 stages |                    |
|--------------|------------------------------------------------|--------------------|-----------------------------------------------------|--------------------|
|              | mean                                           | standard deviation | mean                                                | standard deviation |
| autoclaved   | 7.000                                          | 0.000              | 7.000                                               | 0.000              |
| microbe-rich | 4.500                                          | 0.707              | 6.000                                               | 1.414              |

Data obtained from two independent experiments
