# Supplementary material for: Phlebotomus papatasi Antimicrobial Peptides in Larvae and Females and a Gut-Specific Defensin Upregulated by Leishmania major Infection
Source: MDPI journal article supplement (doi:10.3390/microorganisms9112307), 2021-11-06
Supplement: s1 [file s1]

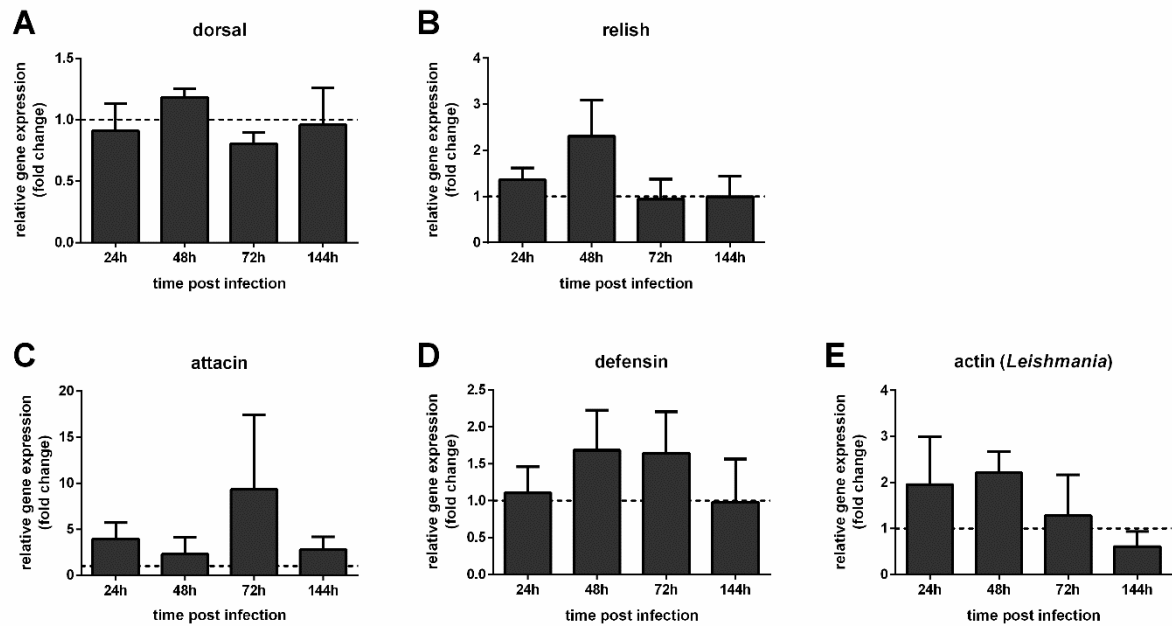

**Figure S3: Relative gene expression of immunity genes in *Leishmania*-infected females with recovered gut bacteria compared to infected females treated with AtbC.** (A) Dorsal; (B) relish; (C) attacin; (D) defensin; (E) *Leishmania* actin. The y-axis represents relative gene expression as fold change values of *Leishmania*-infected females with recovered gut microbiota compared to infected females treated with AtbC (dotted line) collected at the corresponding time points. The x-axis represents females collected at different time points post-infection. Vertical bars represent the average values of three independent experiments, and error bars represent the standard error. No significant differences were found (two-way ANOVA).
