# Supplementary material for: Phlebotomus papatasi Antimicrobial Peptides in Larvae and Females and a Gut-Specific Defensin Upregulated by Leishmania major Infection
Source: MDPI journal article supplement (doi:10.3390/microorganisms9112307), 2021-11-06
Supplement: s1 [file s1]

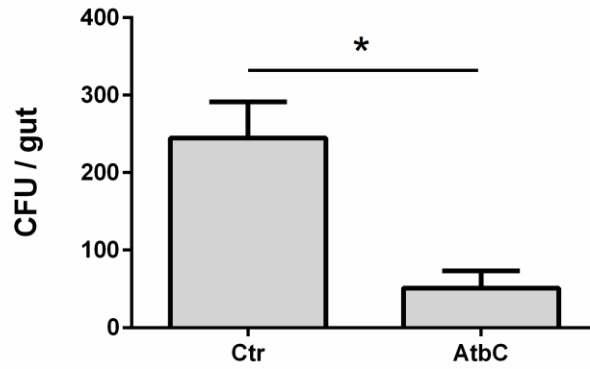

**Figure S1: Effects of AtbC-treatment on CFU from sugar-fed *P. papatasi* dissected guts.** CFU counted from homogenized dissected guts in sterile saline solution, plated on blood agar, and incubated for 48 h at 25 °C. The y-axis indicates the number of CFU per sand fly gut. The x-axis indicates non-treated sand fly control group (Ctr) and AtbC-treated groups. The significant difference was calculated using the t-test analysis (\*  $p < 0.05$ ).
