# Supplementary material for: Phlebotomus papatasi Antimicrobial Peptides in Larvae and Females and a Gut-Specific Defensin Upregulated by Leishmania major Infection
Source: MDPI journal article supplement (doi:10.3390/microorganisms9112307), 2021-11-06
Supplement: s1 [file s1]

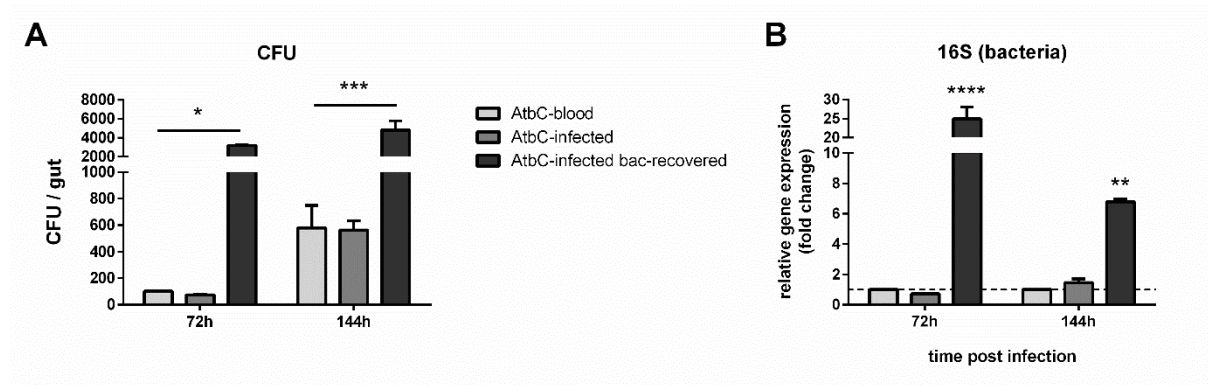

**Figure S2: Effects of AtbC-treatment based on CFU calculation and qPCR bacteria detection from treated and non-treated females.** (A) CFU counted from blood agar plates. The y-axis indicates the average of CFU per sand fly gut counted from triplicate plating. (B) Bacteria 16S rRNA expression by qPCR. The y-axis represents the relative gene expression from dissected guts plotted as fold change values compared to the non-infected control group (AtbC treated). The x-axis indicates the collection time-points. Light grey bars indicate the control group fed on blood containing AtbC (non-infected and bacteria-reduced), mid grey bars indicate *Leishmania* infected flies treated with AtbC (infected and bacteria-reduced), and dark grey bars indicate *Leishmania* infected flies without AtbC (infected and bacteria-recovered). Vertical bars represent the average values of three independent experiments, and error bars represent the standard error. Two-way ANOVA test was carried for significant differences (\*  $p < 0.05$ ; \*\*  $p < 0.01$ ; \*\*\*  $p < 0.001$ ; \*\*\*\*  $p < 0.0001$ ).
