# Supplementary material for: Phlebotomus papatasi Antimicrobial Peptides in Larvae and Females and a Gut-Specific Defensin Upregulated by Leishmania major Infection
Source: Microorganisms. 2021 Nov 6;9(11):2307. doi: 10.3390/microorganisms9112307 (PMC8625375; doi:10.3390/microorganisms9112307)
Supplement: Supplementary file 1 [file microorganisms-09-02307-s001.zip]

Archive with 4 entries (4 files):
- Figure_S1 - Kykalova et al.pdf
- Figure_S2 - Kykalova et al.pdf
- Figure_S3 - Kykalova et al.pdf
- Table_S1 - Kykalova et al.pdf
